# Supplementary material for: Alkoxy chains in ionic liquid anions; effect of introducing ether oxygen into perfluoroalkylborate on physical and thermal properties
Source: Royal Society of Chemistry journal article supplement (doi:10.1039/b916759e), 2010-01-01
Supplement: b916759e.pdf [file b916759e.pdf]

## Supporting Information

# Alkoxy chains in ionic liquid anions; Effect of introducing ether oxygen into perfluoroalkylborate in physical and thermal properties

Naohiro Terasawa,<sup>a</sup> Seiji Tsuzuki,<sup>b</sup> Tatsuya Umecky,<sup>c</sup> Yuria Saito<sup>c</sup> and Hajime Matsumoto,<sup>\*c</sup>

<sup>a</sup> *Research Institute for Cell Engineering, National Institute of Advanced Industrial Science and Technology (AIST), 1-8-31 Midorigaoka, Ikeda, Osaka 563-8577, Japan. Fax: +72-751-8370; Tel: +72-751-7914; E-mail: [terasawa-naohiro@aist.go.jp](mailto:terasawa-naohiro@aist.go.jp)*

<sup>b</sup> *Research Institute for Computational Sciences, National Institute of Advanced Industrial Science and Technology (AIST), 1-1-1 Umezono, Tsukuba, Ibaraki 305-8568, Japan. Fax: +298-61-9288; Tel: +298-61-3171; E-mail: [s.tsuzuki@aist.go.jp](mailto:s.tsuzuki@aist.go.jp)*

<sup>c</sup> *Research Institute for Ubiquitous Energy Devices, National Institute of Advanced Industrial Science and Technology (AIST), 1-8-31 Midorigaoka, Ikeda, Osaka 563-8577, Japan. Fax: +72-751-9622; Tel: +72-751-9426; E-mail: [h-matsumoto@aist.go.jp](mailto:h-matsumoto@aist.go.jp)*

### 1.1. General

<sup>1</sup>H, <sup>19</sup>F, and <sup>11</sup>B NMR spectra were recorded on a JEOL ECA-500 FT-NMR spectrometer operating at 500.2, 470.6 and 160.5 MHz, respectively. FAB-MS were measured on a JEOL JMS-HX110/110A spectrometer. Elemental analysis (C, H and N) was carried out by the Center for Organic Elemental Microanalysis of Kyoto University.

### 1.2. Phase transition

Calorimetric measurements were performed on a differential scanning calorimeter (Perkin-Elmer Pyris 1 equipped with a liquid nitrogen cooling unit). The temperature calibration was performed with the following standard samples: *n*-pentane (melting point: -132.66 °C), cyclohexane (solid-solid transition: -87.06 °C; melting point: 6.54 °C), *n*-decane (melting point: -29.64 °C), benzoic acid (melting point: 122.37 °C), and

indium (melting point: 156.6 °C) used as reference. An average weight of 5-10 mg of each sample was hermetically sealed in an aluminum pan in a dry chamber (Daikin, dew point <-50 °C), and then heated and cooled, both at a rate of 10 °C min<sup>-1</sup>, under a flow of helium gas. Temperature range was -150 °C ~  $T_m + 20$  °C. The glass transition temperature ( $T_g$ , onset of the heat capacity change), and melting point ( $T_m$ , onset of the endothermic peak), where appropriate, was recorded on heating in the second heating/cooling cycle for each salt.

### 1.3. Measurements of the density, viscosity, and conductivity

The following measurements for the room-temperature liquid salts were carried out in a dry chamber (Daikin, HRG-50 A, dew point <-50 °C). The density ( $\rho$ ) was determined from the weight of 0.5 ml soaked up with an electric pipette at 25 °C. The density data in Table 1 is the average value from three measurements of each ILs. The reported value for the density is the average of three measurements. The dynamic viscosity ( $\eta$ ) was examined by a programmable viscometer (Brookfield, LVDV-III+) at 25°C. The conductivity ( $\kappa$ ) measurements were carried out using a computer-controlled Schlumberger Solartron 1260 impedance/gain-phase analyzer with a frequency range from 1 Hz to 1 MHz. Impedance data were analyzed by the complex impedance method. The measurement of the samples was carried out in a commercially available conductivity cell with platinum black electrode cells (Radiometer Analytical, CDC749, cell constant: 1.9 cm<sup>-1</sup>).

### 1.4 Diffusion coefficient

Diffusion coefficients ( $D_H^{obs}$ ,  $D_F^{obs}$ ) of the ionic species were measured using the pulsed gradient spin-echo NMR (PGSE-NMR) technique with a JNM-ECP300W spectrometer. The  $D_H^{obs}$  and the  $D_F^{obs}$  were individually determined by the observation of the <sup>1</sup>H nuclei (300.5 MHz) in cation species and the <sup>19</sup>F nuclei (282.7 MHz) in the anion species. In all measurements, the diffusion time was fixed at 50 ms.

## 2. Synthesis

All materials used are commercially available and were used without further purification.

### 2.1. ***K***[CF<sub>3</sub>OCF<sub>2</sub>CF<sub>2</sub>BF<sub>3</sub>]

To a stirred solution of CF<sub>3</sub>OCF<sub>2</sub>CF<sub>2</sub>I (15.8 g, 50.7 mmol) in anhydrous Et<sub>2</sub>O (300 ml) was added dropwise PhMgBr (3.0M in Et<sub>2</sub>O, 17.5 ml) for 1h at -78°C under N<sub>2</sub> atmosphere. After stirring for 1.5 h at -78°C, B(OCH<sub>3</sub>)<sub>3</sub> (6.2 g, 60 mmol) was added for 10 min. The mixture was stirred continuously for 2 h at -78°C and subsequently warmed to room temperature for 2 h. The resulted suspension poured to the pre-cooled solution (0°C) of 48 % aq. HF (100 ml) and vigorously stirred overnight. After saturation KF at 0°C, the ether phase was separated and the water phase was extracted Et<sub>2</sub>O. The combined ether portions were treated with aq. KHCO<sub>3</sub> and dried. The solvents removed *in vacuo*. Recrystallization from MeOH/CHCl<sub>3</sub> gave the product. (7.7 g, 52.0 %)

<sup>19</sup>F NMR (CD<sub>3</sub>OD, CFCl<sub>3</sub>, 470.6 MHz) δ -54.9 (t, *J* = 10.8 Hz, 3F, CF<sub>3</sub>), -88.4 (s, 2F, OCF<sub>2</sub>), -136.4 (q, *J* = 19.5 Hz, 2F, OCF<sub>2</sub>CF<sub>2</sub>), -154.3 (q, *J* = 40.0 Hz, 3F, BF<sub>3</sub>); <sup>11</sup>B NMR (CD<sub>3</sub>OD, H<sub>3</sub>BO<sub>3</sub>, 160.5 MHz) δ -19.8 (m, 1B); MS *m/z* (%) 253 (100) [CF<sub>3</sub>OCF<sub>2</sub>CF<sub>2</sub>BF<sub>3</sub>]<sup>-</sup>, 545 (100) [2M-K]<sup>-</sup>; Anal Calcd. for C<sub>3</sub>F<sub>10</sub>OBK: C,12.34; Found : C, 12.09.

### 2.2. ***EMI*** [CF<sub>3</sub>OCF<sub>2</sub>CF<sub>2</sub>BF<sub>3</sub>]

To a stirred solution of K[CF<sub>3</sub>OCF<sub>2</sub>CF<sub>2</sub>BF<sub>3</sub>] (1.10 g, 3.8 mmol) in water (35 ml) was added 1-ethyl-3-methylimidazolium chloride (EMICl) (0.54 g, 3.7 mmol) at room temperature. The mixture was stirred for an additional 6 h. The bottom layer was separated, dissolved in CH<sub>2</sub>Cl<sub>2</sub>. The CH<sub>2</sub>Cl<sub>2</sub> phase was separated and the water phase was extracted CH<sub>2</sub>Cl<sub>2</sub>. The combined CH<sub>2</sub>Cl<sub>2</sub> was washed with water. After evaporation, the liquid obtained at 80°C and 0.02 Torr for 24h. (0.90 g, 67.2 %)

<sup>1</sup>H NMR (CD<sub>3</sub>OD, TMS, 500.2 MHz) δ 1.54 (t, *J* = 7.5 Hz, 3H, CH<sub>2</sub>CH<sub>3</sub>), 3.93 (s, 3H, N-CH<sub>3</sub>), 4.26 (q, *J* = 7.5 Hz, 2H, CH<sub>2</sub>CH<sub>3</sub>), 7.52 (s, 1H, imidazole 4-H), 7.59 (s, 1H, imidazole-C5), 8.82 (s, 1H, imidazole 2-H); <sup>19</sup>F NMR (CD<sub>3</sub>OD, CFCl<sub>3</sub>, 470.6 MHz) δ -54.7 (t, *J* = 11.1 Hz, 3F, CF<sub>3</sub>), -88.3 (s, 2F, OCF<sub>2</sub>), -136.4 (m, 2F, OCF<sub>2</sub>CF<sub>2</sub>), -154.1 (q, *J* = 40.0 Hz, 3F, BF<sub>3</sub>); <sup>11</sup>B NMR (CD<sub>3</sub>OD H<sub>3</sub>BO<sub>3</sub>, 160.5 MHz) δ -19.8 (m, 1B); MS *m/z* (%) 111 (100) [EMI]<sup>+</sup>, 253 (100) [CF<sub>3</sub>OCF<sub>2</sub>CF<sub>2</sub>BF<sub>3</sub>]<sup>-</sup>; Anal Calcd. for C<sub>9</sub>H<sub>11</sub>N<sub>2</sub>F<sub>10</sub>OB: C,29.70; H, 3.05; N,7.70; Found : C, 29.60; H, 3.04; N, 8.00

### 2.3. ***DEME***[CF<sub>3</sub>OCF<sub>2</sub>CF<sub>2</sub>BF<sub>3</sub>](0.36 g, 65.5 %)

<sup>1</sup>H NMR (CD<sub>3</sub>OD, TMS, 500.2 MHz) δ 1.34 (t, *J* = 7.3 Hz, 6H, -CH<sub>2</sub>CH<sub>3</sub>), 3.04 (s, 3H, N-CH<sub>3</sub>), 3.39 (s, 3H, -OCH<sub>3</sub>), 3.43 (q, *J* = 7.3 Hz, 4H, -CH<sub>2</sub>CH<sub>3</sub>), 3.51 (t, *J* = 4.5

Hz, 2H, N-**CH**<sub>2</sub>CH<sub>2</sub>O-), 3.79 (m, 2H, N-CH<sub>2</sub>**CH**<sub>2</sub>O-); <sup>19</sup>F NMR (CD<sub>3</sub>OD, CFCl<sub>3</sub>, 470.6 MHz) δ -54.7 (m, 3F, CF<sub>3</sub>), -88.2 (s, 2F, OCF<sub>2</sub>), -136.1 (q, *J* = 18.2 Hz, 2F, OCF<sub>2</sub>**CF**<sub>2</sub>), -153.5 (q, *J* = 40.0 Hz, 3F, BF<sub>3</sub>); <sup>11</sup>B NMR (CD<sub>3</sub>OD H<sub>3</sub>BO<sub>3</sub>, 160.5 MHz) δ -19.6 (m, 1B); MS *m/z* (%) 146 (100) [DEME]<sup>+</sup>, 253 (100) [CF<sub>3</sub>OCF<sub>2</sub>CF<sub>2</sub>BF<sub>3</sub>]<sup>-</sup>; Anal Calcd. for C<sub>11</sub>H<sub>20</sub>NF<sub>10</sub>O<sub>2</sub>B: C,33.11; H, 5.05; N,3.51; Found : C, 33.11; H, 4.76; N, 3.78.

#### 2.4. N<sub>1224</sub>[CF<sub>3</sub>OCF<sub>2</sub>CF<sub>2</sub>BF<sub>3</sub>](1.25 g, 82.9 %)

<sup>1</sup>H NMR (CD<sub>3</sub>OD, TMS, 500.2 MHz) δ 1.02 (t, *J* = 7.5 Hz, 3H, -CH<sub>2</sub>CH<sub>2</sub>CH<sub>2</sub>**CH**<sub>3</sub>), 1.31-1.34 (m, 6H, N-CH<sub>2</sub>**CH**<sub>3</sub>), 1.39-1.46 (m, 2H, -CH<sub>2</sub>CH<sub>2</sub>**CH**<sub>2</sub>CH<sub>3</sub>) 1.67-1.73 (m, 2H, -CH<sub>2</sub>**CH**<sub>2</sub>CH<sub>2</sub>CH<sub>3</sub>), 2.97 (s, 3H, N-CH<sub>3</sub>), 3.21-3.24 (m, 2H, -**CH**<sub>2</sub>CH<sub>2</sub>CH<sub>2</sub>CH<sub>3</sub>), 3.35 (q, *J* = 7.3 Hz, 4H, N-**CH**<sub>2</sub>CH<sub>3</sub>); <sup>19</sup>F NMR (CD<sub>3</sub>OD, CFCl<sub>3</sub>, 470.6 MHz) δ -54.9 (m, 3F, CF<sub>3</sub>), -88.3 (s, 2F, -OCF<sub>2</sub>), -136.1 (q, *J* = 18.2 Hz, 2F, -OCF<sub>2</sub>**CF**<sub>2</sub>), -153.7 (q, *J* = 40.0 Hz, 3F, BF<sub>3</sub>); <sup>11</sup>B NMR (CD<sub>3</sub>OD H<sub>3</sub>BO<sub>3</sub>, 160.5 MHz) δ -19.7 (m, 1B); MS *m/z* (%) 144 (100) [N<sub>1224</sub>]<sup>+</sup>, 253 (100) [CF<sub>3</sub>OCF<sub>2</sub>CF<sub>2</sub>BF<sub>3</sub>]<sup>-</sup>; Anal Calcd. for C<sub>12</sub>H<sub>22</sub>NF<sub>10</sub>OB: C,36.30; H, 5.58; N,3.53; Found : C, 36.12; H, 5.84; N, 3.46.

#### 2.5. P<sub>13</sub>[CF<sub>3</sub>OCF<sub>2</sub>CF<sub>2</sub>BF<sub>3</sub>](0.95 g, 49.9 %)

<sup>1</sup>H NMR (CD<sub>3</sub>OD, TMS, 500.2 MHz) δ 1.03 (t, *J* = 7.5 Hz, 3H, -CH<sub>2</sub>CH<sub>2</sub>**CH**<sub>3</sub>), 1.79-1.90 (m, 2H, -CH<sub>2</sub>**CH**<sub>2</sub>CH<sub>3</sub>), 2.24 (m, 4H, pyrrolidine 3-H and 4-H), 3.04 (s, 3H, N-CH<sub>3</sub>), 3.29 (m, 2H, -**CH**<sub>2</sub>CH<sub>2</sub>CH<sub>3</sub>), 3.46-3.55 (m, 4H, pyrrolidine 2-H and 5-H); <sup>19</sup>F NMR (CD<sub>3</sub>OD, CFCl<sub>3</sub>, 470.6 MHz) δ -54.9 (m, 3F, CF<sub>3</sub>), -88.3 (s, 2F, -OCF<sub>2</sub>), -136.1 (q, *J* = 19.9 Hz, 2F, -OCF<sub>2</sub>**CF**<sub>2</sub>), -153.7 (q, *J* = 41.7 Hz, 3F, BF<sub>3</sub>); <sup>11</sup>B NMR (CD<sub>3</sub>OD H<sub>3</sub>BO<sub>3</sub>, 160.5 MHz) δ -19.2(m, 1B); MS *m/z* (%) 128 (100) [P<sub>13</sub>]<sup>+</sup>, 253 (100) [CF<sub>3</sub>OCF<sub>2</sub>CF<sub>2</sub>BF<sub>3</sub>]<sup>-</sup>; Anal Calcd. for C<sub>11</sub>H<sub>18</sub>NF<sub>10</sub>OB: C,34.67; H, 4.76; N,3.68; Found : C, 34.47; H, 4.73; N, 3.67.
